# Supplementary material for: Indoor Mobility, Frailty, and Disability in Community-Dwelling Older Adults: A Mediation Model
Source: MDPI journal article supplement (doi:10.3390/ijerph191811386), 2022-09-09
Supplement: s1 [file s1]

Supplementary material

|         | B (95% CI)             | GARS<br>RMSE | R <sup>2</sup> | F     | p     |
|---------|------------------------|--------------|----------------|-------|-------|
| Model 1 |                        |              |                |       |       |
| IM      | -0.177 (-0.508, 0.155) | 4.40         | 0.33           | 7.386 | 0.002 |
| TFI     | 0.494 (0.163, 0.825)   |              |                |       |       |
| Model 2 |                        |              |                |       |       |
| IM      | -0.118 (-0.451, 0.216) | 4.29         | 0.37           | 8.538 | 0.001 |
| TFI     | 0.549 (0.215, 0.882)   |              |                |       |       |

Notes: IM, Indoor Mobility; TFI, Tilburg Frailty Index; GARS, Groningen Activity Restriction Scale
